# Supplementary material for: Membrane-anchored uPAR regulates the proliferation, marrow pool size, engraftment, and mobilization of mouse hematopoietic stem/progenitor cells
Source: JCI journal article supplement (doi:10.1172/jci36010), 2009-03-09
Supplement: sd1 [file 1]

**MEMBRANE-ANCHORED U<sup>PAR</sup> REGULATES THE PROLIFERATION, MARROW  
POOL SIZE, ENGRAFTMENT AND MOBILIZATION OF HEMATOPOIETIC  
STEM/PROGENITOR CELLS**

Marc Tjwa et al.

**SUPPLEMENTAL MATERIAL**

## SUPPLEMENTAL RESULTS

### HSPC DISTRIBUTION IN *PLAUR*<sup>-/-</sup> MICE

Translocation of CFU-Cs to the blood was not detected in *Plaur*<sup>-/-</sup> mice in steady-state conditions. The numbers of the CFU-Cs were: (i) in the BM (expressed as  $\times 10^3$  per femur):  $24 \pm 2$  in WT mice *versus*  $14 \pm 1$  in *Plaur*<sup>-/-</sup> mice ( $P < 0.05$ ); (ii) in the peripheral blood (expressed per ml):  $60 \pm 10$  in WT mice *versus*  $70 \pm 10$  *Plaur*<sup>-/-</sup> mice ( $P = \text{NS}$ ); (iii) in the spleen (expressed per  $10^5$  SpMCs):  $13 \pm 2$  in WT mice *versus*  $15 \pm 2$  in *Plaur*<sup>-/-</sup> mice ( $P = \text{NS}$ ). The spleen weight corrected for body weight (mg/g) was  $3.7 \pm 0.3$  in WT mice *versus*  $3.8 \pm 0.3$  in *Plaur*<sup>-/-</sup> mice.

### <sup>M</sup>uPAR CLEAVAGE: RATIONALE FOR THE USE OF THE 5-FU MODEL

Although G-CSF is the classical mobilizing agent, we used in these experiments 5-FU. Indeed, demonstrating that intact <sup>M</sup>uPAR expression levels are reduced on HSPCs during mobilization requires large numbers of cells. As this was technically not feasible when using the G-CSF model, we used 5-FU (200 mg/kg i.v.) to mobilize HSPCs. Apart from mobilizing HSPCs, 5-FU also eliminates lineage-positive cells from the BM leading to proliferation of lineage-negative cells (1). Hence, large numbers of Sca-1<sup>+</sup> HSPCs that are chiefly lineage-negative, can be found in the BM of animals following 5-FU administration (1). Since HSPCs loose their cKit expression during 5-FU (1), we did not analyze cKit<sup>+</sup> BMCs. However, we acknowledge the limitations of analyzing immunophenotypically different HSPC subpopulations.

### FURTHER EVIDENCE FOR <sup>M</sup>uPAR CLEAVAGE DURING HSPC MOBILIZATION

<sup>S</sup>uPAR levels in the BM plasma increased during mobilization in WT but not *Plg*<sup>-/-</sup> mice (not shown). By contrast, the MFI signal of the AK17 antibody, which recognizes all forms of <sup>M</sup>uPAR, remained unchanged on Sca-1<sup>+</sup> BMCs in WT and *Plg*<sup>-/-</sup> mice ( $p = \text{NS}$ ; not shown), indicating the absence of genotypic differences in <sup>M</sup>uPAR expression or catabolism during mobilization.

## SUPPLEMENTAL FIGURES

### SUPPLEMENTAL FIGURE 1: Expression of <sup>M</sup>uPAR on HSPCs.

**A**, Representative FACS dot plot revealing the expression of <sup>M</sup>uPAR on Lin<sup>-</sup>cKit<sup>+</sup> HSPCs (*left*, isotype control: *right*). Lin<sup>-</sup> BMCs were gated. **B**, To further assess whether *Plaur*<sup>-/-</sup> HSPCs home and engraft following transplantation, we co-transplanted *Plaur*<sup>-/-</sup> and WT donor BMMCs in lethally irradiated WT mice. To identify the transplanted donor cells, cells were harvested from WT and *Plaur*<sup>-/-</sup> mice, that had been intercrossed with syngeneic mice ubiquitously expressing GFP (*Actb:GFP* mice). GFP<sup>+</sup> WT and *Plaur*<sup>-/-</sup> cells were mixed in a 3:1, 1:1, or 1:3 ratio with *Plaur*<sup>-/-</sup> GFP<sup>-</sup> and WT GFP<sup>-</sup> competitor cells, respectively, and a total of 1 x 10<sup>6</sup> BMMCs were transplanted into GFP<sup>-</sup> WT recipients irradiated at 8 Gy. Compared to WT GFP<sup>+</sup> cells, fewer *Plaur*<sup>-/-</sup> GFP<sup>+</sup> donor BMMCs contributed to the hematopoietic repopulation of recipient WT mice at 8 weeks after transplantation. Even when three-fold more *Plaur*<sup>-/-</sup> GFP<sup>+</sup> BMMCs were co-transplanted with WT GFP<sup>-</sup> competitor cells, only ~20% GFP<sup>+</sup> cells were detected in the blood of recipient mice after 8 weeks. Of note, the reduced short-term repopulation of labeled *Plaur*<sup>-/-</sup> cells *versus* WT cells, when transplanted in 1:1 ratio with radioprotective cells, is consistent with the notion of a partially depleted HSPC pool in the BM of *Plaur*<sup>-/-</sup> mice. \*: *P*<0.05 (*N*=6-10).

### SUPPLEMENTAL FIGURE 2: Loss of <sup>M</sup>uPAR increases HSPC proliferation.

**A,B**, Representative FACS histogram plots of cell cycle analysis of WT (**A**) and *Plaur*<sup>-/-</sup> (**B**) Lin<sup>-</sup>cKit<sup>+</sup> HSPCs in steady-state conditions. **C**, Quantitative analysis of the cell cycle status in WT and *Plaur*<sup>-/-</sup> Lin<sup>-</sup>cKit<sup>+</sup> HSPCs in steady-state conditions. Compared to WT, fewer Lin<sup>-</sup>cKit<sup>+</sup> HSPCs in the BM of *Plaur*<sup>-/-</sup> mice were in G<sub>0</sub>/G<sub>1</sub>. \*: *P*<0.05 *versus* WT (*N*=4). **D**, Compared to WT mice, fewer Lin<sup>-</sup>cKit<sup>+</sup> HSPCs in the *Plaur*<sup>-/-</sup> mice were Pyronin Y<sup>low</sup>. \*: *P*<0.05 *versus* WT (*N*=4). **E,F**, Compared to WT mice, more Lin<sup>-</sup>cKit<sup>+</sup> HSPCs in *Plaur*<sup>-/-</sup> mice proliferated (**E**) or were apoptotic (**F**). \*: *P*<0.05 *versus* WT (*N*=4).

### SUPPLEMENTAL FIGURE 3: Plasmin cleaves <sup>M</sup>uPAR during mobilization.

**A,** For plasmin to be a candidate proteinase capable of cleaving <sup>M</sup>uPAR in vivo, it should be expressed in the BM during HSPC mobilization. In normal BM, plasmin was undetectable in baseline conditions (<1 AU/ml). However, in conditions of HSPC mobilization (2 days after G-CSF), plasmin levels were transiently upregulated (*upper*, *N*=3) and declined thereafter again by day 5 to undetectable levels. At 2 days after G-CSF, the increased plasmin activity coincides with peak expansion of HSPCs in the BM (our unpublished observations). Plasmin levels were also transiently elevated in the 5-FU model on day 3 and day 7 (*lower*, *N*=3). **B,** Apart from cleaving <sup>M</sup>uPAR between D<sub>I</sub> and D<sub>II</sub>, plasmin also cleaves recombinant uPAR at the juxtamembrane domain (2). In doing so, plasmin induces the release of D<sub>I</sub>D<sub>II</sub>D<sub>III</sub> or, in case plasmin first cleaves off the D<sub>I</sub> domain, of D<sub>II</sub>D<sub>III</sub>. ELISA measurements of intact <sup>M</sup>uPAR in total cell extracts of MDA-MB-231 cells, which express <sup>M</sup>uPAR (3), indeed showed that plasmin (administered as active plasmin or urokinase + plasminogen) lowered the amount of intact <sup>M</sup>uPAR in these cells (*N*=6; *P*<0.05). As expected, plasmin also increased the levels of <sup>S</sup>uPAR (D<sub>II</sub>D<sub>III</sub> and D<sub>I</sub>D<sub>II</sub>D<sub>III</sub>) in the conditioned medium of these cells (1,130 ± 200% of control levels; *N*=6; *P*<0.05). Further experiments using the domain-specific anti-uPAR antibodies revealed that plasmin also cleaves <sup>M</sup>uPAR between D<sub>I</sub> and D<sub>II</sub> (data not shown). Thus, plasmin cleaves <sup>M</sup>uPAR on intact cells in vitro.

### SUPPLEMENTAL FIGURE 4: Molecular mechanisms of <sup>M</sup>uPAR

**A,B,** Upon adhesion of WT Lin<sup>-</sup>cKit<sup>+</sup> HSPCs to immobilized sVCAM-1 (bottom of the picture), α4β1 (green; *A*) and <sup>M</sup>uPAR (red; *B*) seemed to cluster, as revealed by multiphoton confocal microscopy (3D reconstruction). Nuclear DAPI staining is shown in blue. **C,** <sup>M</sup>uPAR does not cooperate with CXCR-4. Indeed, FACS analysis showed that inhibition or loss of <sup>M</sup>uPAR did not affect the expression of CXCR-4 on Lin<sup>-</sup>cKit<sup>+</sup> HSPCs (not shown). To study the response of *Plaur*<sup>-/-</sup> HSPCs to SDF-1, we administered the CXCR-4 inhibitor AMD3100 to *Plaur*<sup>-/-</sup> mice and found that mobilization of CFU-Cs was comparable in WT and *Plaur*<sup>-/-</sup> mice (CFU-Cs × 10<sup>3</sup> per ml blood: 1.1 ± 0.2 in WT mice *versus* 1.0 ± 0.2 in *Plaur*<sup>-/-</sup> mice; *N*=6; *P*=NS). Furthermore, pre-treatment with AMD3100 modestly reduced homing of Ly5.1<sup>+</sup> Lin<sup>-</sup>cKit<sup>+</sup> HSPCs to the BM, as was found previously by others (4), but, importantly, a

combination of AMD3100 plus neutralizing anti-<sup>M</sup>uPAR antibodies further impaired the homing of Ly5.1<sup>+</sup> Lin<sup>-</sup>cKit<sup>+</sup> HSPCs to the BM, indicating that both pathways operate separately. Data are expressed as % of control. For reasons of clarity and comparison, the data with anti-<sup>M</sup>uPAR (Figure 3B) are shown again. \*:  $P < 0.05$  versus control IgG; #:  $P < 0.05$  versus AMD3100 ( $N = 4-6$ ). **D**, <sup>M</sup>uPAR does not cooperate with mKitL. When performing in vitro adhesion assays with isolated Lin<sup>-</sup>cKit<sup>+</sup> HSPCs using mKitL-expressing BM stromal cells as substrate, inhibition or loss of <sup>M</sup>uPAR antibodies failed to inhibit cKit-mediated adhesion and FACS analysis showed that inhibition or loss of <sup>M</sup>uPAR did not affect the expression of cKit on Lin<sup>-</sup>cKit<sup>+</sup> HSPCs (not shown). Data are expressed as % of control ( $N = 8$ ).

**SUPPLEMENTAL FIGURE 5:** Expression of <sup>M</sup>uPAR on KSL cells.

**A**, Representative FACS dot plot revealing the expression of <sup>M</sup>uPAR on KSL cells.

## SUPPLEMENTAL TABLES

**SUPPLEMENTAL TABLE 1:** Hematopoietic profile of WT and *Plaur*<sup>-/-</sup> mice.

|                                            | WT mice   | <i>Plaur</i> <sup>-/-</sup> mice |
|--------------------------------------------|-----------|----------------------------------|
| <b>WBC (x 10<sup>3</sup>/μl)</b>           | 6.1 ± 0.8 | 7.0 ± 0.5                        |
| <b>% neutrophils</b>                       | 9 ± 2     | 11 ± 3                           |
| <b>% monocytes</b>                         | 5 ± 1     | 8 ± 1                            |
| <b>% lymphocytes</b>                       | 86 ± 2    | 81 ± 3                           |
| <b>RBC (x 10<sup>6</sup>/μl)</b>           | 8.2 ± 0.2 | 8.3 ± 0.2                        |
| <b>Hct (%)</b>                             | 44 ± 1    | 46 ± 1                           |
| <b>Reticulocytes (x 10<sup>5</sup>/μl)</b> | 36 ± 3    | 31 ± 4                           |

Values represent the mean ± SEM of the hematological parameters in WT (n=15) and *Plaur*<sup>-/-</sup> (n=15) mice in steady-state conditions. *P*=NS versus WT.

## REFERENCES

1. Randall, T.D., and Weissman, I.L. 1997. Phenotypic and functional changes induced at the clonal level in hematopoietic stem cells after 5-fluorouracil treatment. *Blood* 89:3596-3606.
2. Beaufort, N., Leduc, D., Rousselle, J.C., Namane, A., Chignard, M., and Pidard, D. 2004. Plasmin cleaves the juxtamembrane domain and releases truncated species of the urokinase receptor (CD87) from human bronchial epithelial cells. *FEBS Lett* 574:89-94.
3. Holst-Hansen, C., Johannessen, B., Hoyer-Hansen, G., Romer, J., Ellis, V., and Brunner, N. 1996. Urokinase-type plasminogen activation in three human breast cancer cell lines correlates with their in vitro invasiveness. *Clin Exp Metastasis* 14:297-307.
4. Bonig, H., Priestley, G.V., and Papayannopoulou, T. 2006. Hierarchy of molecular-pathway usage in bone marrow homing and its shift by cytokines. *Blood* 107:79-86.

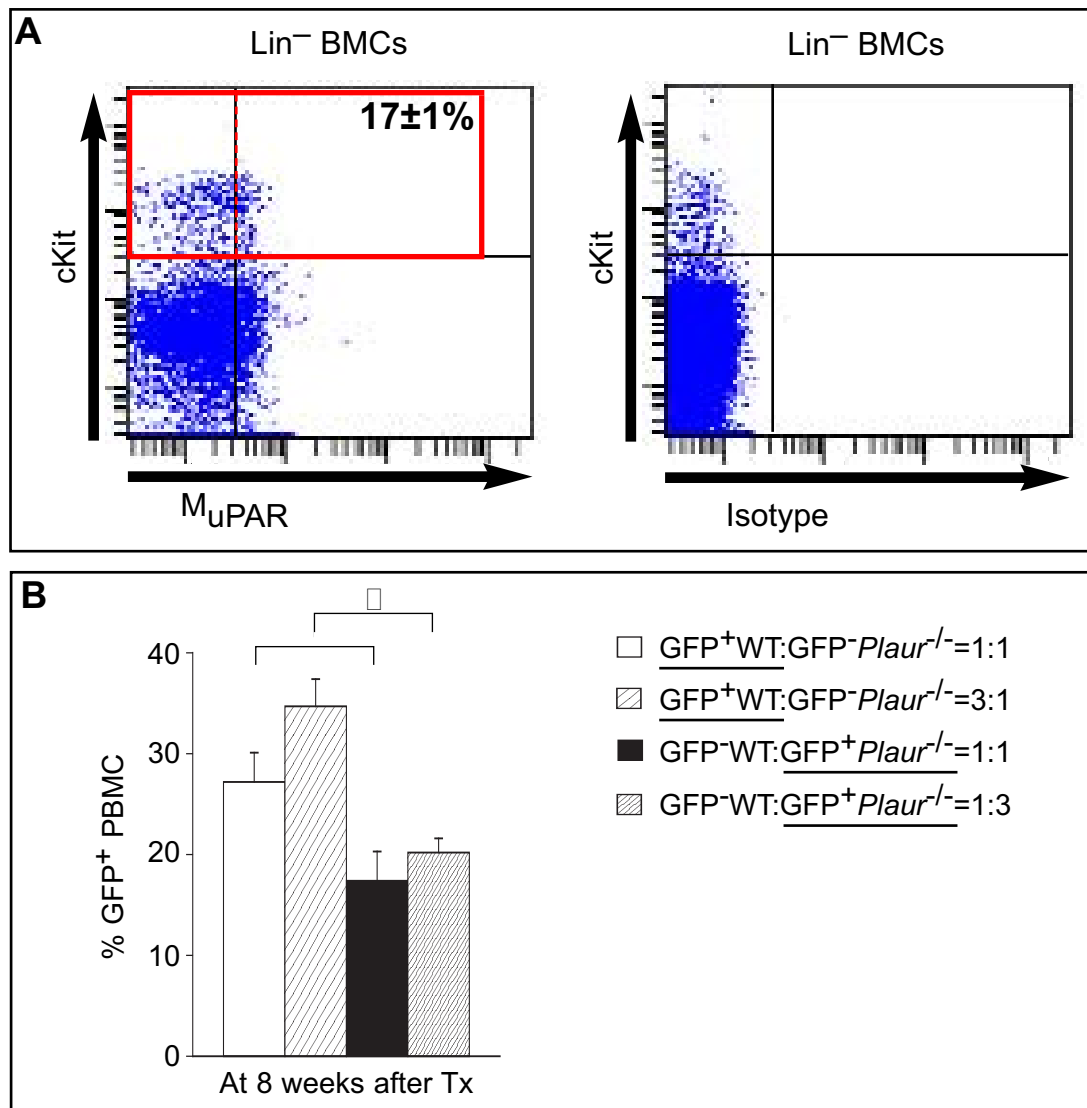

**Supplemental Figure 1**

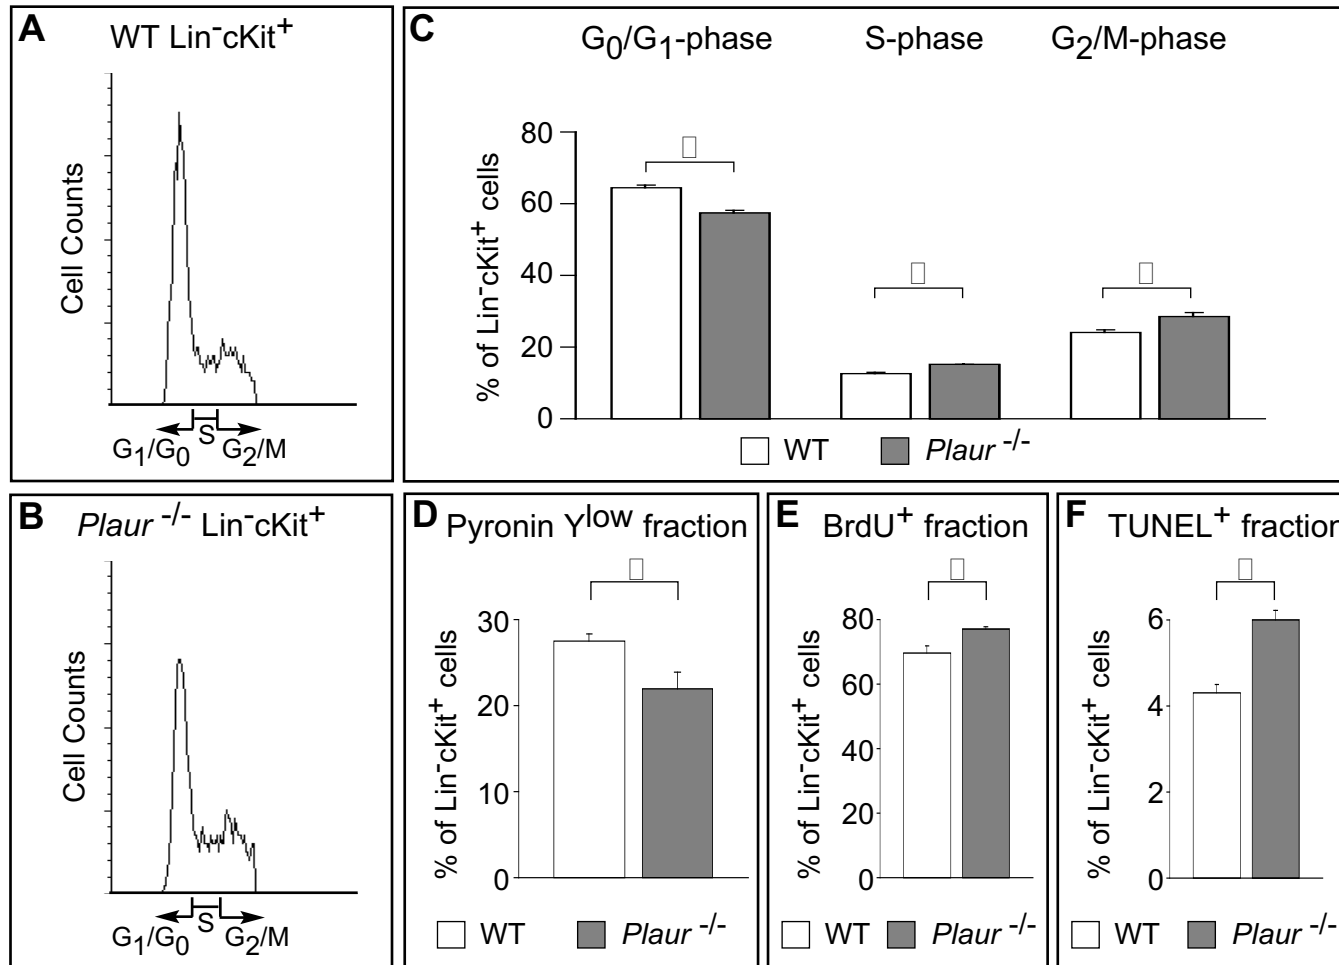

**Supplemental Figure 2**

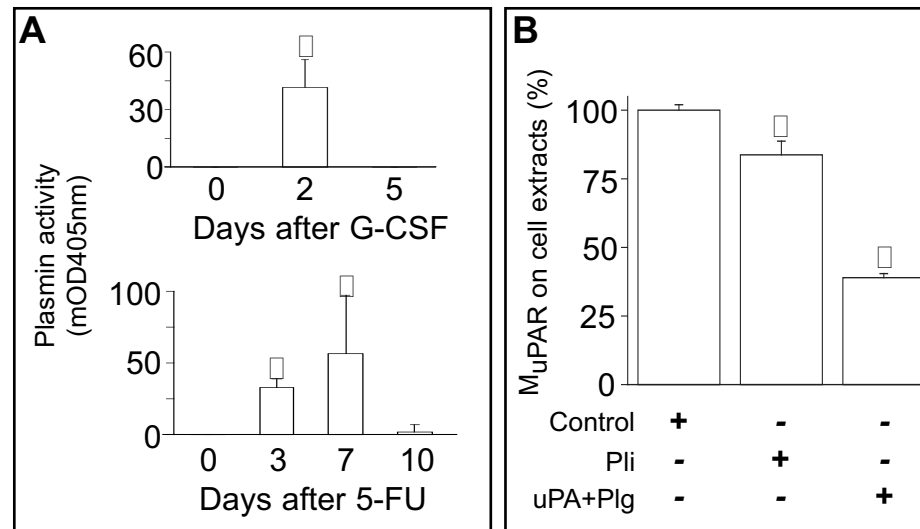

**Supplemental Figure 3**

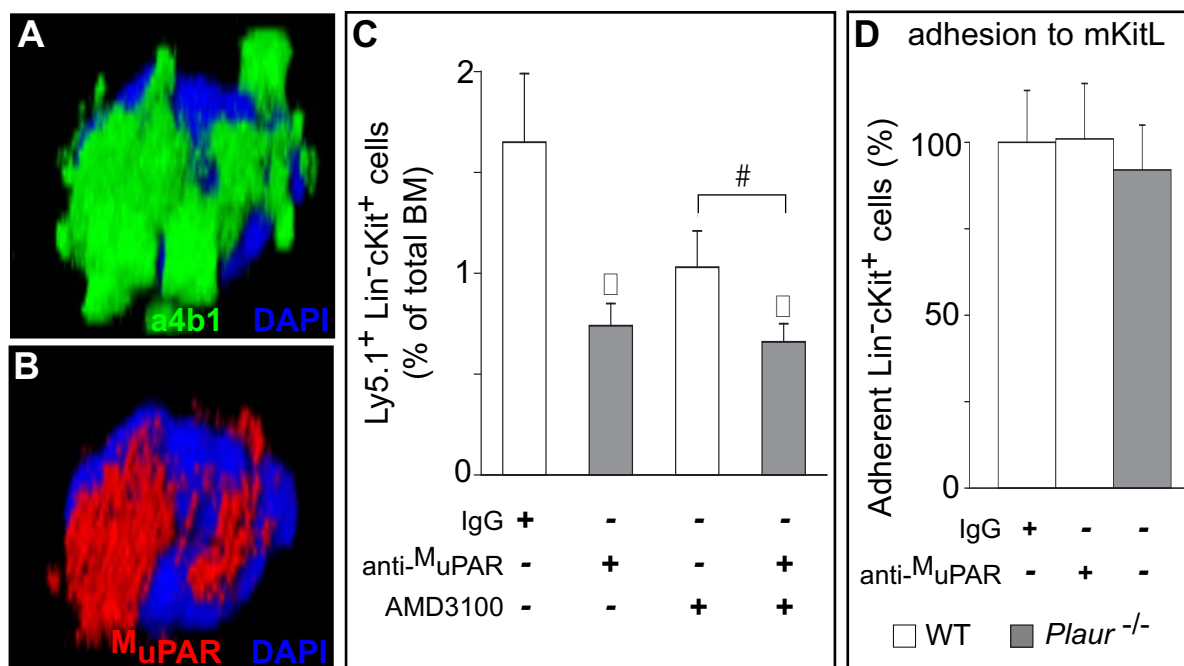

**Supplemental Figure 4**

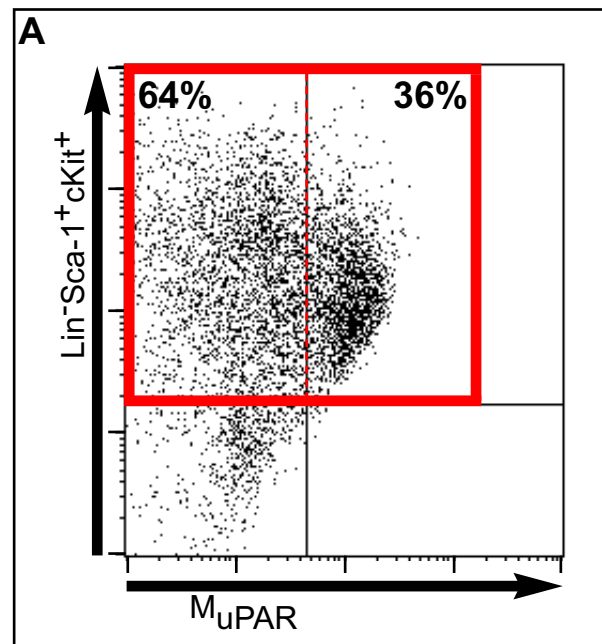

**Supplemental Figure 5**
